# Supplementary material for: Mortality and high risk of major adverse events in patients with COVID-19 and history of cardiovascular disease
Source: PubMed Central journal article supplement — Open Heart. 2021 Apr 8;8(1):e001526. doi: 10.1136/openhrt-2020-001526 (PMC8039226; doi:10.1136/openhrt-2020-001526), 2021-04-08
Supplement: openhrt-2020-001526supp001.pdf [file openhrt-2020-001526supp001.pdf]

## Supplemental Material

### Table of contents:

|                                                                                         |         |
|-----------------------------------------------------------------------------------------|---------|
| List of investigators                                                                   | page 2  |
| Supplementary Methods                                                                   | page 3  |
| Covid-19 diagnostic tool and hospitalization criteria                                   |         |
| Study definitions of history of cardiovascular disease and cardiovascular risks factors |         |
| Statistical analysis: complementary information                                         |         |
| Supplemental Material Table 1: Laboratory values at admission                           | page 5  |
| Supplemental Material Table 2: Medication at admission and composite outcome            | page 6  |
| Supplemental Material Table 3: Sensitivity analysis                                     | page 8  |
| Treatment during hospitalization                                                        | page 9  |
| References                                                                              | page 10 |

**List of Investigators**

François Mach, MD, Chief of Cardiology Department, University Hospitals of Geneva, Rue Gabrielle Perret-Gentil 4, 1205 Geneva, Switzerland.

Elena Tessitore, MD, Department of Cardiology, University Hospitals of Geneva, Rue Gabrielle Perret-Gentil 4, 1205 Geneva, Switzerland.

## Supplementary Methods

### Covid-19 diagnostic tool and hospitalization criteria

The most common Covid-19 diagnostic tool at admission was the nasopharyngeal swab, with a PCR performed in 824 patients (98%). Bronchoalveolar washing was performed in 7 patients (1%) and 8 patients had a blood test with positive antibody (1%).

The hospitalization criteria for Covid-19 patients were determined according to the WHO guidelines (having a pneumonia with CURB-65  $\geq 2$ , oxygen dependency, tachypnea ( $\geq 20/\text{min}$ ), any organ failure, and altered conscious status).<sup>1</sup> Criteria for the intensive care unit admission were followed according to the Swiss Medical Society of Intensive Care Medicine.<sup>2</sup>

### Study definitions

CV risks factors were defined as: hypertension, obesity (based on patients' records of their height and weight and defined as body mass index (BMI)  $\geq 30 \text{ kg/m}^2$ , dyslipidemia, diabetes (type I or type II), active smoking, physical inactivity, stress, family history of CVD and familial hypercholesterolemia.

Comorbidities were determined as follows: myocardial infarction (MI), either ST Elevation MI (STEMI), non ST Elevation MI (NSTEMI), unstable angina (UA), stable angina, were defined according to the international guidelines.<sup>3</sup> Myocarditis was defined at the cardiac MRI with evidence of myocardial inflammation, according to the guidelines.<sup>4</sup> Pericarditis was defined as inflammation to the pericardium with associated symptoms, according to the European guidelines.<sup>5</sup> Heart failure, transthoracic echocardiography with left ventricle ejection fraction  $< 50 \%$ , heart failure symptoms and elevated NT-pro BNP according to the European guidelines.<sup>6</sup>

Peripheral artery disease was defined as narrowed arteries with reduced blood flow to the limbs, according to the European guidelines.<sup>7</sup>

Moderate or severe chronic kidney failure were defined when GFR (Glomerular Filtration Rate) was between 59 and  $30 \text{ mL/min/1.73m}^2$  and  $< 30 \text{ mL/min/1.73m}^2$ , respectively.<sup>8</sup>

Venous thrombotic complications included: pulmonary embolism, portal vein thrombosis and deep vein thrombosis.

### Statistical analysis: complementary information

Patients' characteristics were described overall and according to clinical status at discharge (survived, survived but MACE, dead). Qualitative parameters were compared between the three groups using chi-square test or Fisher's exact test, whilst age was compared between groups using Kruskal-Wallis test.

Primary and secondary outcomes were described and compared according to the history of CVD: composite outcome, vital status, MACE and its components, ICU admission, IMCU admission and admission to a rehabilitation care unit were compared between patients without history of CVD and patients with history of CVD using a chi-square test or a Fisher's exact test. Total length of stay, Intensive Care Unit (ICU) length of stay, Intermediate Care Unit (IMCU) length of stay and rehabilitation length of stay were compared between the two groups using Welch Student test.

Laboratory values measured at admission were compared between groups according to clinical status at discharge (survived, survived but MACE, dead) using Kruskal-Wallis test.

Treatment at admission was compared between groups according to the primary composite outcome (discharge alive with no MACE vs. MACE and/or death). Crude and age-adjusted OR were estimated using logistic regression model to assess associations between medication at admission and the primary composite outcome.

**Supplemental Material Table 1: Laboratory values at admission**

| Lab value (n)      | All patients<br>(n=839) | Survived<br>(n=615) | Survived         |                      | P value |
|--------------------|-------------------------|---------------------|------------------|----------------------|---------|
|                    |                         |                     | with<br>(n=72)   | MACE Died<br>(n=152) |         |
| Urea (817)         | 5.3 (3.8 - 7.8)         | 4.6 (3.4 - 6.4)     | 7.8 (5.7 - 10.6) | 8.4 (5.8 - 13.9)     | <0.001  |
| Thrombocytes (815) | 195 (152 - 248)         | 197 (157 - 247)     | 204 (157 - 266)  | 186 (134 - 246)      | 0.09    |
| Sodium (817)       | 136 (134 - 139)         | 136 (134 - 139)     | 136 (133 - 139)  | 137 (133 - 140)      | 0.31    |
| Leucocytes (814)   | 5.9 (4.4 - 8)           | 5.7 (4.3 - 7.5)     | 6.2 (4.8 - 8.1)  | 7.2 (4.9 - 10.4)     | <0.001  |
| Lymphocytes (748)  | 0.9 (0.6 - 1.3)         | 1 (0.7 - 1.4)       | 0.9 (0.6 - 1.2)  | 0.7 (0.5 - 1)        | <0.001  |
| Potassium (807)    | 3.9 (3.6 - 4.2)         | 3.9 (3.6 - 4.1)     | 4.1 (3.7 - 4.5)  | 4 (3.6 - 4.5)        | <0.001  |
| Haemoglobin (814)  | 133 (120 - 145)         | 136 (125 - 147)     | 124 (110 - 141)  | 121 (103 - 137)      | <0.001  |
| Erythrocytes (815) | 4.5 (4 - 4.9)           | 4.6 (4.2 - 5)       | 4.3 (3.6 - 4.7)  | 4 (3.4 - 4.6)        | <0.001  |
| CRP (804)          | 54 (22 - 97)            | 50 (20 - 91)        | 51 (13 - 82)     | 78 (41 - 148)        | <0.001  |
| Creatinine (817)   | 80 (65 - 105)           | 76 (63 - 95)        | 98 (79 - 126)    | 108 (76 - 157)       | <0.001  |
| ALT (779)          | 30 (21 - 46)            | 31 (23 - 50)        | 28 (17 - 37)     | 24 (17 - 40)         | <0.001  |
| AST (767)          | 39 (28 - 57)            | 39 (28 - 57)        | 35 (25 - 48)     | 45 (30 - 67)         | 0.02    |
| AST/ALT (767)      | 1.3 (1 - 1.7)           | 1.2 (1 - 1.5)       | 1.4 (1.1 - 2)    | 1.7 (1.3 - 2.2)      | <0.001  |

CRP: C reactive protein, ALT: Alanine Transaminase, AST: Aspartate Transaminase.

Values are all median (Q1-Q3)

All P values are according to Kruskal-Wallis test.

**Unit of measure:** Urea (mmol/l), Thrombocytes (G/l) Sodium (mmol/l) Leucocytes (G/l) Lymphocytes (%), Potassium (mmol/l) Haemoglobin (g/l), Erythrocytes (T/l), CRP (mg/l), Creatinine ( $\mu$ mol/l), ALAT (U/l), ASAT (U/l).

**Supplemental Material Table 2: Medication at admission and composite outcome**

| Medication<br>at admission | No<br>(n=615) | event<br>(n=224) | Composite |                     | OR<br>P value       |        |
|----------------------------|---------------|------------------|-----------|---------------------|---------------------|--------|
|                            |               |                  | outcome   | Crude<br>[95%CI]    |                     |        |
| Statin                     | 119 (19%)     | 74 (33%)         |           | 2.06 [1.46 to 2.89] | 1.25 [0.85 to 1.82] | 0.26   |
| Antiaggregant              | 109 (18%)     | 70 (31%)         |           | 2.11 [1.48 to 2.99] | 1.12 [0.76 to 1.65] | 0.57   |
| ARBs                       | 106 (17%)     | 60 (27%)         |           | 1.76 [1.22 to 2.52] | 1.24 [0.83 to 1.85] | 0.3    |
| Betablocker                | 69 (11%)      | 77 (34%)         |           | 4.14 [2.86 to 6.03] | 2.34 [1.55 to 3.53] | <0.001 |
| Calcium-channel<br>blocker | 62 (10%)      | 47 (21%)         |           | 2.37 [1.56 to 3.58] | 1.61 [1.01 to 2.58] | 0.05   |
| Loop Diuretics             | 43 (7%)       | 65 (29%)         |           | 5.44 [3.57 to 8.35] | 2.57 [1.62 to 4.1]  | <0.001 |
| Thiazide Diuretics         | 74 (12%)      | 31 (14%)         |           | 1.17 [0.74 to 1.83] | 0.86 [0.52 to 1.39] | 0.54   |
| Anticoagulant              | 47 (8%)       | 48 (21%)         |           | 3.3 [2.13 to 5.11]  | 1.43 [0.88 to 2.32] | 0.14   |
| ACE inhibitor              | 59 (10%)      | 35 (16%)         |           | 1.75 [1.1 to 2.72]  | 1.19 [0.72 to 1.95] | 0.5    |

ARBs: Angiotensin II Receptors Blockers, ACE inhibitor: Angiotensin Converting Enzyme Inhibitor.

#### Definition of categories

- In the category of statins, all of the following were included: simvastatin, rosuvastatin, atorvastatin, any other statin.
- In the category of antiaggregants, all of the following were included: aspirine, tocagrelor, prasugrel, clopidogrel.
- In the category of ARBs, all of the following were included: olmesartan, valsartan, losartan, irbesartan, candesartan, telmisartan.
- In the category of beta-blockers, all of the following were included: metoprolol, carvedilol, bisoprolol, atenolol, propanolol.
- In the category of calcium channel blockers, all of the following were included: amlodipine, nifedipine, felopidine, verapamil, diltiazem.

- In the category of loop diuretic, all of the following were included: torasemide, furosemide, bumetanide, piretanide.
- In the category of thiazide diuretics, all of the following were included: indapamide, hydrochlorothiazide, chlortalidone.
- In the category of anticoagulants, all of the following were included: rivaroxaban, dabigatran, apixaban, edoxaban, sintrom.
- In the category of ACE-inhibitors, all of the following were included: ramipril, enalapril, lisinopril, perindopril, captopril.

**Supplemental Material Table 3: Sensitivity analysis**

|                                 | Composite outcome (n=216/759) |         | Death (n=133/681)   |         |
|---------------------------------|-------------------------------|---------|---------------------|---------|
|                                 | Adjusted OR [95%CI]           | P value | Adjusted OR [95%CI] | P value |
| History of CV disease           | 2.4 [1.6 to 3.6]              | <0.001  | 3.2 [1.9 to 5.6]    | <0.001  |
| Age (per 10 years)              | 2.2 [1.9 to 2.7]              | <0.001  | 2.5 [2.0 to 3.3]    | <0.001  |
| Male Sex                        | 1.6 [1.1 to 2.4]              | 0.02    | 1.8 [1.1 to 3.1]    | 0.02    |
| Lung opacity/infiltration       | 1.9 [1.2 to 3.0]              | 0.01    | 2.8 [1.6 to 4.9]    | <0.001  |
| Hypertension                    | 0.82 [0.53 to 1.2]            | 0.35    | 0.85 [0.49 to 1.5]  | 0.55    |
| Obesity (BMI $\geq$ 30) (n=759) | 1.5 [0.92 to 2.4]             | 0.11    | 1.7 [0.91 to 3.1]   | 0.09    |
| Dyslipidemia                    | 0.85 [0.55 to 1.3]            | 0.44    | 0.70 [0.41 to 1.2]  | 0.18    |
| Diabetes                        | 1.4 [0.85 to 2.2]             | 0.19    | 1.5 [0.82 to 2.6]   | 0.19    |
| Smoking                         | 1.6 [0.65 to 3.7]             | 0.29    | 1.3 [0.37 to 4.2]   | 0.63    |
| COPD                            | 2.0 [0.98 to 4.0]             | 0.06    | 2.0 [0.87 to 4.4]   | 0.10    |
| Obstructive Sleep Apnea         | 1.2 [0.64 to 2.3]             | 0.53    | 1.2 [0.52 to 2.6]   | 0.69    |
| High Creatinine* (n=817)        | -                             |         | 1.1 [0.63 to 1.8]   | 0.82    |
| CRP (per 10 unit) (n=804)       | -                             |         | 1.11 [1.07 to 1.15] | <0.001  |
| Anemia † (n=814)                | -                             |         | 1.4 [0.82 to 2.3]   | 0.22    |
| AST/ALT>1 (n=767)               | -                             |         | 1.6 [0.79 to 3.5]   | 0.21    |

CV: cardiovascular, CRP: C reactive protein (mg/l), ALT: Alanine Transaminase (U/l), AST: Aspartate Transaminase (U/l). COPD: chronic obstructive pulmonary disease.

\* Defined as creatinine>80  $\mu$ mol/l for females and creatinine>106  $\mu$ mol/l for males

† Anaemia defined as haemoglobin <120 g/L for women and haemoglobin <140g/L for men.



### **Covid-19 treatment protocol during hospitalization**

A standardized Covid-19 protocol was established by our institution and was applied to all patients hospitalized for Covid-19 and who presented specific severity criteria.<sup>9</sup> Medications administered were: lopinavir 200 mg / ritonavir 50 mg 2 cp twice a day during 5 days and hydroxychloroquine 600 mg once during hospitalization, unless contraindications to those medications were present. (Contraindications to these treatments included long QT interval on ECG).

In cases of severe ARDS secondary to Covid-19 pneumonia, requiring intubation with  $\geq 7$  days since the onset of symptoms, a multidisciplinary discussion for each case was held for eligibility to receive anakinra treatment (antagonist of the interleukin-1 receptor), if not neutropenia, if normal kidney function and not increased procalcitonin or suspicion of bacterial infection.

Based on institutional protocol, 31% of patients received lopinavir / ritonavir (Kaletra) and 36% hydroxychloroquine as in-hospital treatment. Patients with CVD were less frequently prescribed lopinavir / ritonavir (19%) as well as hydroxychloroquine (24%) as compared to those without CVD, respectively 38% and 42%. This was probably due to contraindications of these two treatments in patients with known CVD, as well as interactions with other medications and to electrolyte abnormalities. Azithromycin was prescribed in 6% of all patients. Those with a history of CVD were less likely to receive azithromycin (4%) as compared to those without a history of CVD (8%), probably because of the well-known potential risk of the QT prolongation by this drug. Nevertheless only 2% of overall patients presented a long QT interval ( $\geq 500$  ms) at admission's ECG. Contraindications to these treatments included long QT interval on ECG.

## References

1. WHO Guideline Development Group for Clinical Management of COVID-19. Clinical management of COVID-19. Interim guidance. <https://www.who.int/publications/i/item/clinical-management-of-covid-19>
2. Covid-19 pandemic triage for intensive care treatment\_Swiss Academy of Medical Science. <https://www.sams.ch/en/Ethics/Topics-A-to-Z/Intensive-care-medicine.html>. (2020) [
3. Thygesen K, Alpert JS, Jaffe AS, et al. Fourth Universal Definition of Myocardial Infarction (2018). *Journal of the American College of Cardiology* 2018;72(18):2231-64. doi: 10.1016/j.jacc.2018.08.1038 [published Online First: 2018/08/30]
4. Friedrich MG, Sechtem U, Schulz-Menger J, et al. Cardiovascular magnetic resonance in myocarditis: A JACC White Paper. *Journal of the American College of Cardiology* 2009;53(17):1475-87. doi: 10.1016/j.jacc.2009.02.007 [published Online First: 2009/04/25]
5. Adler Y, Charron P, Imazio M, et al. 2015 ESC Guidelines for the diagnosis and management of pericardial diseases: The Task Force for the Diagnosis and Management of Pericardial Diseases of the European Society of Cardiology (ESC)Endorsed by: The European Association for Cardio-Thoracic Surgery (EACTS). *European heart journal* 2015;36(42):2921-64. doi: 10.1093/eurheartj/ehv318 [published Online First: 2015/09/01]
6. Ponikowski P, Voors AA, Anker SD, et al. 2016 ESC Guidelines for the diagnosis and treatment of acute and chronic heart failure: The Task Force for the diagnosis and treatment of acute and chronic heart failure of the European Society of Cardiology (ESC)Developed with the special contribution of the Heart Failure Association (HFA) of the ESC. *European heart journal* 2016;37(27):2129-200. doi: 10.1093/eurheartj/ehw128 [published Online First: 2016/05/22]
7. Aboyans V, Ricco JB, Bartelink MEL, et al. 2017 ESC Guidelines on the Diagnosis and Treatment of Peripheral Arterial Diseases, in collaboration with the European Society for Vascular Surgery (ESVS): Document covering atherosclerotic disease of extracranial carotid and vertebral, mesenteric, renal, upper and lower extremity arteriesEndorsed by: the European Stroke Organization (ESO)The Task Force for the Diagnosis and Treatment of Peripheral Arterial Diseases of the European Society of Cardiology (ESC) and of the European Society for Vascular Surgery (ESVS). *European heart journal* 2018;39(9):763-816. doi: 10.1093/eurheartj/ehx095 [published Online First: 2017/09/10]
8. Levey AS, Eckardt KU, Tsukamoto Y, et al. Definition and classification of chronic kidney disease: a position statement from Kidney Disease: Improving Global Outcomes (KDIGO). *Kidney international* 2005;67(6):2089-100. doi: 10.1111/j.1523-1755.2005.00365.x [published Online First: 2005/05/11]
9. University Hospital of Geneva. Recommandations pour les professionnels de la santé. <https://www.hug.ch/coronavirus/recommandations-pour-professionnels-sante#prise-charge>
